# Supplementary material
Source: MDPI journal article supplement (https://www.mdpi.com/2071-1050/13/5/2528)
Supplement: s1 [file s1]

Environmental Survey

## Introduction

### Consent to Participate

Welcome to this survey. Your participation in this survey is **completely voluntary**. You may decline altogether, or leave blank any questions you do not wish to answer. Your responses will remain strictly **confidential** and **anonymous**, as individual responses cannot be identified. Data from this research will only be reported in aggregated levels.

You must be 18 years or older as well as an undergraduate student to participate in the survey and the raffle. If you agree to participate in this survey, please answer each question as best you can. It should take approximately **10 min** to complete.

**At the end of the survey, you will have the opportunity to enter a raffle to win 1 out of 10 \$25 Amazon gift cards. Winners will receive notification via email.**

There are no known risks to participate in this survey beyond those encountered in everyday life and no anticipated direct benefits to your participation in this survey. However, your participation will allow you to take part in research that may contribute to our understanding of environmental knowledge, preferences, and behavior on campus. Results from this survey will help us identify ways to make our campus more environmentally friendly. By clicking on the arrow below, you give your consent to participate in this survey.

To begin the survey, please click on the arrow below, or you may exit your browser to leave this website.

## Consent

What is your age?

Are you an undergraduate student at Manhattan College?

- Yes
- No

## Environmental Behavior

Do you use the **double-sided printing** option when you print at the following locations?

|                | Yes                   | No                    | Not Applicable        |
|----------------|-----------------------|-----------------------|-----------------------|
| At the library | <input type="radio"/> | <input type="radio"/> | <input type="radio"/> |
| At home        | <input type="radio"/> | <input type="radio"/> | <input type="radio"/> |

How frequently do you use **plastic straws**?

- Every time I buy a drink
- Almost every time I buy a drink
- Sometimes
- Rarely
- Never

Have you declined a **plastic straw** during this past month? (e.g. at a restaurant)

- Yes
- No
- Not applicable

Are you currently, or have you ever been involved in any environmental groups, environmental volunteer activities, or environmental donation projects?

- Yes
- No

Are you currently, or have you ever taken any **environmental-related course**?

- Yes
- No

Which of the following do you identify as:

- Vegan (does not consume meat or animal by-products)
- Vegetarian (does not consume meat)
- Semi-Vegetarian (occasionally consumes meat or by-products)
- Pescatarian (consumes fish but not meat)
- None of the above (consumes meat regularly)

How often do you **recycle** the following?

|                       | Always                | Most of the time      | Sometimes             | Rarely                | Never                 | Not Applicable        |
|-----------------------|-----------------------|-----------------------|-----------------------|-----------------------|-----------------------|-----------------------|
| Paper                 | <input type="radio"/> |
| Plastic water bottles | <input type="radio"/> |
| Other plastic bottles | <input type="radio"/> |
| Other plastics        | <input type="radio"/> |
| Cans                  | <input type="radio"/> |
| Glass bottles         | <input type="radio"/> |

How often do you **reuse** plastic bags?

- Always
- Most of the time
- Sometimes
- Rarely
- Never

How often do you **recycle** plastic bags?

- Always
- Most of the time
- Sometimes
- Rarely
- Never

## Recycling

What motivates you to recycle **the most**?

- It's good for the environment.
- It's easy and convenient for me.
- I'm concerned about landfill space.
- I'm concerned about climate change.
- It's my civic duty.

Please rate the degree to which you agree or disagree with the following statements.

|                                                                           | Strongly Agree        | Agree                 | Uncertain             | Disagree              | Strongly disagree     |
|---------------------------------------------------------------------------|-----------------------|-----------------------|-----------------------|-----------------------|-----------------------|
| It is important for everyone to recycle.                                  | <input type="radio"/> |
| It is important for you, personally, to recycle.                          | <input type="radio"/> |
| Recycling makes a difference in protecting the health of the environment. | <input type="radio"/> |

How would you rate Manhattan College's recycling program?

- Excellent
- Above average
- Average
- Below average
- Poor

How convenient is Manhattan College's recycling program for you?

- Very convenient
- Somewhat convenient
- Neither convenient or inconvenient
- Somewhat inconvenient
- Very inconvenient

## Plastic Water Bottles

On average, how many **servings** of the following do you drink per week? Use the slider to choose your answer.

|                                                                                       | Number of Servings |   |    |    |    |    |    |    |    |    |    | > 50 servings            |
|---------------------------------------------------------------------------------------|--------------------|---|----|----|----|----|----|----|----|----|----|--------------------------|
|                                                                                       | 0                  | 5 | 10 | 15 | 20 | 25 | 30 | 35 | 40 | 45 | 50 |                          |
| Tap water (1 serving = 1 glass of 8 oz)                                               |                    |   |    |    |    |    |    |    |    |    |    | <input type="checkbox"/> |
| Plastic bottled water (1 serving = 1 bottle of 16 oz)                                 |                    |   |    |    |    |    |    |    |    |    |    | <input type="checkbox"/> |
| Other plastic bottled beverages such as juice or soda (1 serving = 1 bottle of 16 oz) |                    |   |    |    |    |    |    |    |    |    |    | <input type="checkbox"/> |
| Canned beverages (1 serving = 1 can of 12 oz)                                         |                    |   |    |    |    |    |    |    |    |    |    | <input type="checkbox"/> |

Please rate the degree to which you agree or disagree with the following statement:

|                                                                           | Strongly Agree        | Agree                 | Uncertain             | Disagree              | Strongly disagree     |
|---------------------------------------------------------------------------|-----------------------|-----------------------|-----------------------|-----------------------|-----------------------|
| There is no real difference in taste between bottled water and tap water. | <input type="radio"/> |
| It is worth paying for bottled water instead of drinking tap water.       | <input type="radio"/> |
| Tap water is safe to drink in <b>NYC</b> .                                | <input type="radio"/> |
| Tap water is safe to drink <b>on campus</b> .                             | <input type="radio"/> |
| There are enough water fountains/refill stations on campus.               | <input type="radio"/> |
| The water refill stations need maintenance on campus.                     | <input type="radio"/> |
| Cleaning a reusable water bottle requires too much time and effort.       | <input type="radio"/> |

### Green Fund Proposal

Suppose a ballot initiative has been drafted by the new student government to create a mandatory green fee for all students. The green fee will fund sustainability projects on campus. This initiative will pass if it receives more "yes" votes than "no" votes. If passed, the initiative will require **an additional fee charged to your student account** each semester that will contribute to the green fund.

Please keep in mind your own personal financial situation and how the proposed fee would affect your personal budget.

### Referendum\$5

Are you in favor of a mandatory green fee of **\$5 per semester** for all students that will fund sustainability projects on campus?

- Yes  
 No

### Referendum\$10

Are you in favor of a mandatory green fee of **\$10 per semester** for all students that will fund sustainability projects on campus?

- Yes  
 No

#### Referendum\$15

Are you in favor of a mandatory green fee of **\$15 per semester** for all students that will fund sustainability projects on campus?

- Yes  
 No

#### Referendum\$20

Are you in favor of a mandatory green fee of **\$20 per semester** for all students that will fund sustainability projects on campus?

- Yes  
 No

#### Referendum\$25

Are you in favor of a mandatory green fee of **\$25 per semester** for all students that will fund sustainability projects on campus?

- Yes  
 No

#### Climate Change

How important is the issue of climate change to you personally?

- Extremely important  
 Very important  
 Somewhat important  
 Slightly important  
 Not at all important

For climate change, where would you place yourself on the degree of information needed to form a firm opinion?

- I need a lot more information
- I need some more information
- I need a little more information
- I do not need any more information

How certain are you that climate change is happening?

- Very certain
- Certain
- Uncertain
- Climate change is not happening

Which statement is most aligned with your view of humans' role in climate change?

- Humans can reduce climate change
- Humans might be able to reduce climate change
- Humans can't reduce climate change

Which statement is most aligned with your view of humans' role in climate change mitigation? Mitigation refers to the "efforts of making a condition or a consequence less severe".

- Humans can mitigate climate change successfully
- Humans could mitigate but it's unclear at this point whether we will succeed
- Humans aren't willing to change their behavior, so we're not going to mitigate



Please rate the degree in which you agree or disagree with each statement.

|                                                                                 | Strongly agree        | Agree                 | Uncertain             | Disagree              | Strongly disagree     |
|---------------------------------------------------------------------------------|-----------------------|-----------------------|-----------------------|-----------------------|-----------------------|
| Economic growth is crucial, even if it leads to environmental problems          | <input type="radio"/> |
| Environmental protection is necessary, even if it costs jobs or economic growth | <input type="radio"/> |
| Environmental protection and economic growth can sustainably co-exist           | <input type="radio"/> |

Thinking about the following agencies, organizations, and groups, how much do you trust or distrust them as sources of information about climate change and its potential impacts?

|                     | Strongly trust        | Trust                 | Neither trust nor distrust | Distrust              | Strongly distrust     | Don't know the source |
|---------------------|-----------------------|-----------------------|----------------------------|-----------------------|-----------------------|-----------------------|
| Brietbart News      | <input type="radio"/> | <input type="radio"/> | <input type="radio"/>      | <input type="radio"/> | <input type="radio"/> | <input type="radio"/> |
| CNN                 | <input type="radio"/> | <input type="radio"/> | <input type="radio"/>      | <input type="radio"/> | <input type="radio"/> | <input type="radio"/> |
| Fox News            | <input type="radio"/> | <input type="radio"/> | <input type="radio"/>      | <input type="radio"/> | <input type="radio"/> | <input type="radio"/> |
| New York Times      | <input type="radio"/> | <input type="radio"/> | <input type="radio"/>      | <input type="radio"/> | <input type="radio"/> | <input type="radio"/> |
| Wall Street Journal | <input type="radio"/> | <input type="radio"/> | <input type="radio"/>      | <input type="radio"/> | <input type="radio"/> | <input type="radio"/> |
| Washington Post     | <input type="radio"/> | <input type="radio"/> | <input type="radio"/>      | <input type="radio"/> | <input type="radio"/> | <input type="radio"/> |

## Demographics

This last block of questions asks you about your socio-demographic characteristics and college profile.

What is your gender?

- Female
- Male
- Other

Which race or ethnicity best describes you?

- American Indian or Alaskan Native
- Asian or Pacific Islander
- African American
- Hispanic or Latino
- White or Caucasian
- Other
- Prefer not to answer

Which school of study are you part of?

- School of Business
- School of Education & Health
- School of Engineering
- School of Liberal Arts
- School of Science
- School of Continuing & Professional Studies

What year are you in at Manhattan College?

- Freshman
- Sophomore
- Junior
- Senior

What is your overall grade point average (GPA)?

- Less than 1.5
- 1.5 to 1.99
- 2.0 to 2.49
- 2.5 to 2.99
- 3.0 to 3.49
- 3.5 to 3.749
- 3.75 to 4.0

Are you a first-generation college student? (You are a student whose parent(s)/legal guardian(s) have not completed a bachelor's degree and you are the first in your family to attend a four year college/university to attain a bachelor's degree.)

- Yes  
 No

Have you worked for pay while being a full-time college student?

- Yes  
 No

On average, how many hours do you work for pay per week while being a full-time college student?  
(Use the slider to choose your answer)

0 4 8 12 16 20 24 28 32 36 40

Weekly hours



What is your average biweekly take-home pay (after-tax income)?

- None  
 Less than \$100  
 \$100 to \$199  
 \$200 to \$299  
 \$300 to \$399  
 \$400 or more

Are you a student athlete?

- Yes  
 No

How often to do you exercise?

- 4-6 times a week
- 2-3 times a week
- Once per week
- Twice a month
- One a month
- Never

Which political party do you feel closer to?

- Democratic Party
- Republican Party
- Independent
- No affiliation

### Raffle

Thank you for participating in this Environmental Survey! To show our appreciation, you are now given the opportunity to win one **\$25 Amazon gift card**. A total of **10 cards** will be raffled. In order to enter into the raffle, you will be directed to a different site, disconnected to the current survey, where you will be asked to enter your email address. Do you want to participate in the raffle?

- Yes
- No
